# Supplementary material for: Anticancer activity, DNA binding and docking study of M(ii)-complexes (M = Zn, Cu and Ni) derived from a new pyrazine–thiazole ligand: synthesis, structure and DFT
Source: Royal Society of Chemistry journal article supplement (doi:10.1039/d0nj05883a), 2021-01-01
Supplement: d0nj05883a1.pdf [file d0nj05883a1.pdf]

## Anticancer activity, DNA binding and docking study of M(II)-complexes (M=Zn, Cu and Ni) derived from a new pyrazine-thiazole ligand: Synthesis, structure and DFT

Pradip Bera<sup>a,d</sup>, Abhishek Aher<sup>b</sup>, Paula Brandao<sup>c</sup>, Sunil K Manna<sup>\*b</sup>, Indranil Bhattacharyya<sup>a</sup>, Gopinath Mondal<sup>a</sup>, Abhimanyu Jana<sup>a</sup>, Ananyakumari Santra<sup>a</sup> and PulakeshBera<sup>\*a</sup>

Table S1: Crystal parameters of **PyztbH**, **1**, **2**, **3** and **4**

Table S2: Selected bond angle of the **PyztbH** and **1**, **2**, **3** and **4**

Table S3: Hydrogen bond parameters (Å) for **PyztbH** and **2**

**Figure S1.** UV-Vis spectra of the **PyztbH**, **1**, **2**, **3** and **4** at  $10^{-5}$  M in MeOH solution.

**Figure S2.** Fluorescence emission plot of **PyztbH**, **1**, **2**, **3** and **4** in DMSO solvent at  $10^{-5}$  M ( $\lambda_{\text{ex}} = 330$  nm).

**Figure S3.**  $\pi$ - $\pi$  stacking interaction and 1D hydrogen bonded supramolecular chain along a-axis of **PyztbH**

**Figure S4.**  $\pi$ - $\pi$  stacking interaction of **1**

**Figure S5.** 3D hydrogen bonded supramolecular Structure and molecular association along the b-axis of **2**

**Figure S6.**  $\pi$ - $\pi$  stacking interaction of **3**

**Figure S7.**  $\pi$ - $\pi$  stacking interaction of **4**

**Figure S8.** a) Capped-ball and stick model viewed into groove binder of DNA with **1**. The important interactions between different sections of the **1**-DNA complex are illustrated with green, red and gray solid line. The non-coordinate acetyl -CH<sub>3</sub> group, benzene ring interacts with DNA by hydrophobic and  $\pi_{\text{adinine}}-\pi$  stacking interaction respectively (b) space filled model of binding mode and hydrophobic interaction of **1** with DNA.

**Figure S9.** a) Capped-ball and stick model viewed into groove binder of DNA with **2**. The important interactions between different sections of the **2**-DNA complex are illustrated with dotted solid line. (b) space filled model of binding mode and hydrophobic interaction of **2** with DNA.

**Figure S10.** a) Capped-ball and stick model viewed into intercalate binder of DNA with **4**. The important interactions between different sections of the **4**-DNA complex are illustrated

with arrow solid line. (b) Space filled model of binding mode and hydrophobic interaction of **4** with DNA.

**Figure S11.** Effect of compounds on cytotoxicity of different cancer cells.

**Table S1:** Crystal parameters of **PyztbH**, **1**, **2**, **3** and **4**

| Parameter                   | <b>PyztbH</b>                                    | <b>1</b>                                                          | <b>2</b>                                                                                                                                | <b>3</b>                                            | <b>4</b>                                                                          |
|-----------------------------|--------------------------------------------------|-------------------------------------------------------------------|-----------------------------------------------------------------------------------------------------------------------------------------|-----------------------------------------------------|-----------------------------------------------------------------------------------|
| CCDC/CSD                    | 1865480                                          | 1960775                                                           | 1960776                                                                                                                                 | 1960777                                             | 1960778                                                                           |
| Empirical formula           | C <sub>16</sub> H <sub>12</sub> N <sub>6</sub> S | C <sub>32</sub> H <sub>22</sub> N <sub>12</sub> S <sub>2</sub> Zn | C <sub>19</sub> H <sub>14</sub> N <sub>8</sub> S <sub>3</sub> ZnO <sub>2</sub> ,<br>2(C <sub>16</sub> H <sub>12</sub> N <sub>6</sub> S) | C <sub>17</sub> H <sub>15</sub> CuN <sub>9</sub> OS | C <sub>32</sub> H <sub>22</sub> N <sub>12</sub> NiS <sub>2</sub> ClO <sub>4</sub> |
| Fw, g/M                     | 320.38                                           | 704.13                                                            | 1188.70                                                                                                                                 | 456.99                                              | 796.88                                                                            |
| Crystal system              | Monoclinic                                       | monoclinic                                                        | Monoclinic                                                                                                                              | Triclinic                                           | Triclinic                                                                         |
| Space group                 | P21/n                                            | C2/c                                                              | C2/c                                                                                                                                    | P $\bar{1}$                                         | P $\bar{1}$                                                                       |
| a (Å)                       | 7.9257(6)                                        | 37.6726(13)                                                       | 36.253(2)                                                                                                                               | 7.0292(5)                                           | 9.7741(11)                                                                        |
| b (Å)                       | 17.9072(12)                                      | 9.0541(3)                                                         | 14.2625(8)                                                                                                                              | 11.1309(9)                                          | 12.1509(13)                                                                       |
| c (Å)                       | 10.7961(7)                                       | 18.5487(7)                                                        | 25.1293(14)                                                                                                                             | 12.1913(9)                                          | 14.0740(16)                                                                       |
| A                           | 90                                               | 90                                                                | 90                                                                                                                                      | 77.463(3)                                           | 94.392(4)                                                                         |
| B                           | 92.024(2)                                        | 105.77                                                            | 125.447(1)                                                                                                                              | 87.811(3)                                           | 90.811(4)                                                                         |
| Γ                           | 90                                               | 90                                                                | 90                                                                                                                                      | 81.426(3)                                           | 94.002(4)                                                                         |
| V (Å <sup>3</sup> )         | 1531.30(18)                                      | 6088.6(4)                                                         | 10585.0(10)                                                                                                                             | 920.70(12)                                          | 1662.2(3)                                                                         |
| Z                           | 4                                                | 1.536                                                             | 8                                                                                                                                       | 2                                                   | 2                                                                                 |
| T(k)                        | 150                                              | 150                                                               | 150                                                                                                                                     | 150                                                 | 150                                                                               |
| σ calcd, g cm <sup>-3</sup> | 1.390                                            | 1.536                                                             | 1.492                                                                                                                                   | 1.648                                               | 1.592                                                                             |
| μ (mm <sup>-1</sup> )       | 0.220                                            | 0.991                                                             | 0.725                                                                                                                                   | 1.331                                               | 0.849                                                                             |
| F (000)                     | 664                                              | 2880                                                              | 4880                                                                                                                                    | 466                                                 | 814                                                                               |
| R, wR, S                    | 0.0385,<br>0.1018, 1.04                          | 0.0347, 0.0841,<br>1.04                                           | 0.0546, 0.1405, 1.03                                                                                                                    | 0.0346, 0.0817,<br>1.04                             | 0.0487, 0.1315, 1.03                                                              |

**Table S2:** Selected bond angle of the **PyztbH** and **1**, **2**, **3** and **4**

| <b>PyztbH</b> |                      | <b>1</b>  |                             | <b>2</b> |                             | <b>3</b> |                             | <b>4</b>  |                             |
|---------------|----------------------|-----------|-----------------------------|----------|-----------------------------|----------|-----------------------------|-----------|-----------------------------|
| Bond          | Angle(°)             | Bond      | Angle (°)<br>Crystal<br>DFT | Bond     | Angle (°)<br>Crystal<br>DFT | Bond     | Angle (°)<br>Crystal<br>DFT | Bond      | Angle (°)<br>Crystal<br>DFT |
| N1-C4-C5      | 118.04(12)<br>117.84 | N1-Zn-N3  | 74.46(7)<br>74.43           | N1-Zn-N3 | 73.26(15)<br>73.30          | N1-Cu-N3 | 79.10(7)<br>78.66           | N1-Ni-N3  | 82.20(11)<br>82.19          |
| C5-N3-N4      | 119.74(11)<br>119.65 | N1-Zn-N7  | 88.38(7)<br>88.44           | N1-Zn-N7 | 95.99(13)<br>95.96          | N1-Cu-N5 | 158.57(7)<br>157.69         | N1-Ni-N7  | 91.67(10)<br>91.67          |
| N4-C7-N5      | 123.41(12)<br>123.38 | N1-Zn-N9  | 95.72(8)<br>95.75           | N1-Zn-N8 | 94.05(15)<br>93.99          | N1-Cu-N7 | 91.79(7)<br>91.77           | N1-Ni-N9  | 94.22(11)<br>94.25          |
| N5-C9-C10     | 118.15(11)<br>118.10 | N1-Zn-N11 | 93.17(7)<br>93.13           | N3-Zn-N5 | 76.58(14)<br>76.58          | N3-Cu-N5 | 79.47(7)<br>79.05           | N1-Ni-N11 | 88.98(10)<br>88.98          |
| C3-C4-C5      | 120.89(11)<br>120.64 | N3-Zn-N5  | 76.82(8)<br>76.71           | N3-Zn-N7 | 118.64(15)<br>118.52        | N3-Cu-N7 | 164.38(8)<br>164.07         | N3-Ni-N5  | 81.43(10)<br>81.37          |
|               |                      | N3-Zn-N7  | 90.08(7)<br>90.12           | N3-Zn-N8 | 132.54(16)<br>132.41        | N1-Cu-O1 | 89.19(6)<br>89.84           | N3-Ni-N7  | 93.20(10)<br>93.23          |
|               |                      | N3-Zn-N9  | 161.70(8)<br>161.71         | N7-Zn-N5 | 101.77(14)<br>11.74         | N3-Cu-O1 | 93.63(6)<br>94.03           | N3-Ni-N9  | 174.53(11)<br>174.56        |
|               |                      | N3-Zn-N11 | 117.75(8)<br>117.82         | N7-Zn-N8 | 107.91(15)<br>108.16        | N5-Cu-O1 | 92.45(6)<br>92.53           | N3-Ni-N11 | 102.53(10)<br>102.51        |
|               |                      | N5-Zn-N7  | 89.76(7)<br>89.73           | N8-Zn-N5 | 103.54(15)<br>103.52        | N7-Cu-O1 | 98.95(7)<br>98.70           | N5-Ni-N7  | 90.18(10)<br>90.19          |
|               |                      | N5-Zn-N9  | 111.34(7)                   |          |                             |          |                             | N5-Ni-N9  | 102.18(10)                  |

|  |  |           |                     |  |  |  |  |           |                     |
|--|--|-----------|---------------------|--|--|--|--|-----------|---------------------|
|  |  |           | 111.43              |  |  |  |  |           | 102.21              |
|  |  | N5–Zn–N11 | 101.88(7)<br>102.01 |  |  |  |  | N5–Ni–N11 | 93.64(11)<br>93.65  |
|  |  | N7–Zn–N9  | 73.99(7)<br>73.97   |  |  |  |  | N7–Ni–N9  | 82.74(10)<br>82.73  |
|  |  | N7–Zn–N11 | 151.50(8)<br>151.38 |  |  |  |  | N7–Ni–N11 | 164.19(9)<br>164.18 |
|  |  | N9–Zn–N11 | 77.54(8)<br>77.45   |  |  |  |  | N9–Ni–N11 | 81.46(10)<br>81.46  |

**Table S3:** Hydrogen bond parameters (Å) for **PyztbH** and **2**

| Compound | D–H ...A       | D–H (Å)   | H...A (Å) | D...A (Å)  | D–H...A (°) | Symmetry operation on A |
|----------|----------------|-----------|-----------|------------|-------------|-------------------------|
| PyztbH   | N4 H4 N2       | 0.873(18) | 2.095(18) | 2.9515(17) | 166.9(15)   | $-1/2+x, 3/2-y, 1/2+z$  |
| 2        | N4 H4 O200     | 0.89(5)   | 1.86(5)   | 2.716(7)   | 162(4)      | $-1/2+x, -1/2+y, z$     |
|          | N12 H12A O100  | 0.90(5)   | 2.27(5)   | 3.113(7)   | 157(4)      |                         |
|          | N18 H18A N6    | 0.91(5)   | 2.20(5)   | 2.20(5)    | 165(4)      |                         |
|          | O200 H20A N14  | 0.82(5)   | 2.08(4)   | 2.889(6)   | 169(6)      |                         |
|          | O200 H20B O100 | 0.84(6)   | 1.96(5)   | 2.792(6)   | 173(6)      |                         |

## FIGURES

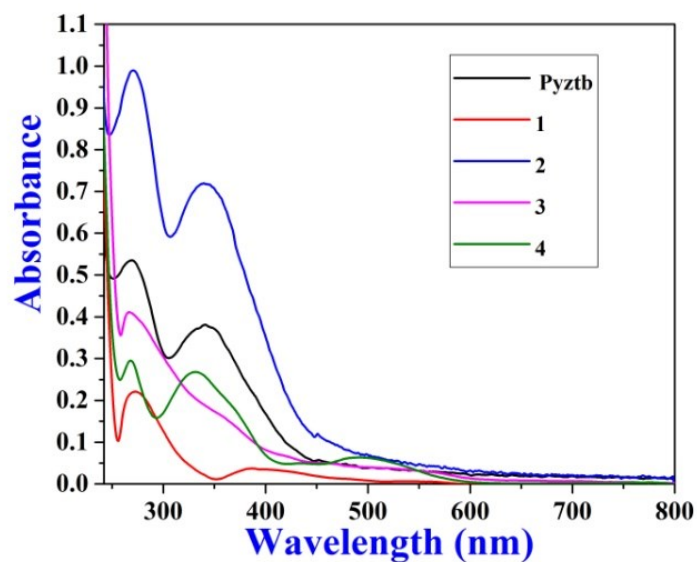

**Figure S1.** UV-Vis spectra of the **PyztbH**, **1**, **2**, **3** and **4** at  $10^{-5}$  M in DMSO.

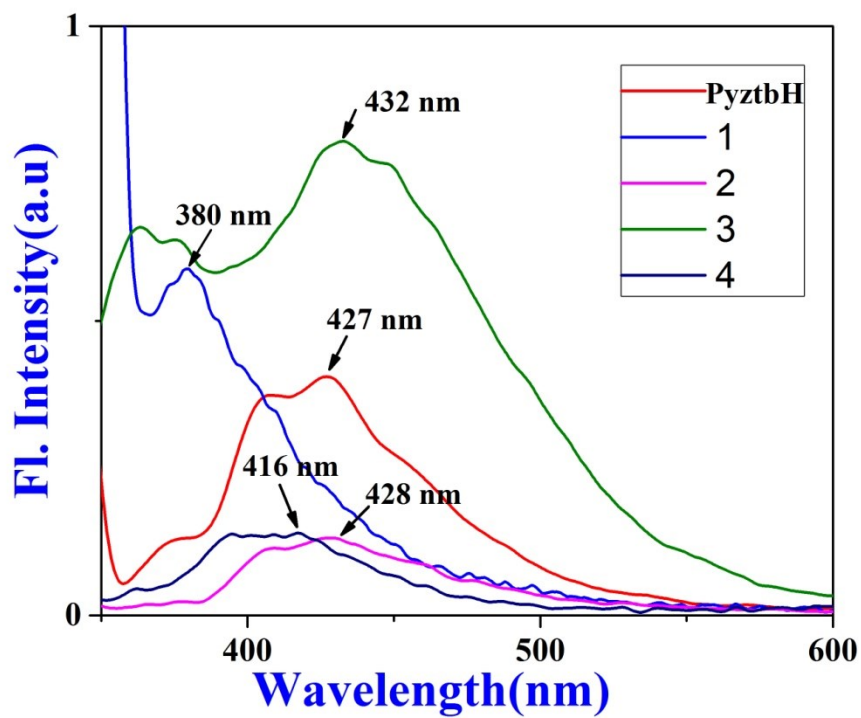

**Figure S2.** Fluorescence emission plot of PzbtbH, 1, 2, 3 and 4 in DMSO at  $10^{-5}$  M ( $\lambda_{\text{ex}} = 330$  nm).

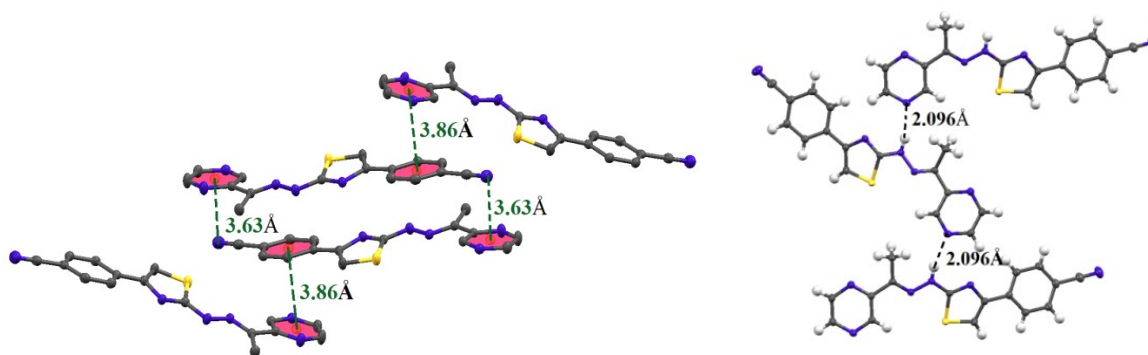

**Figure S3.**  $\pi$ - $\pi$  stacking interaction and 1D hydrogen bonded supramolecular chain along a-axis of PzbtbH

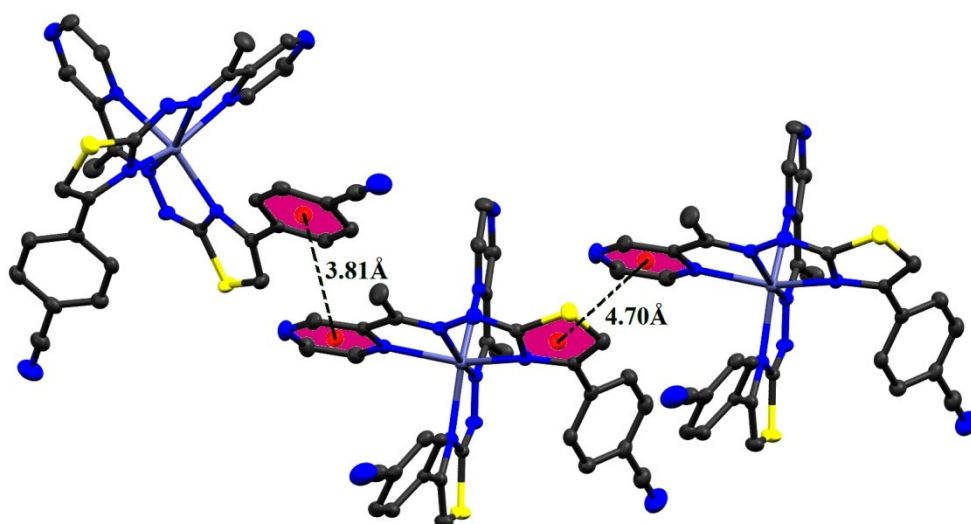

**Figure S4.**  $\pi$ - $\pi$  stacking interaction of **1**.

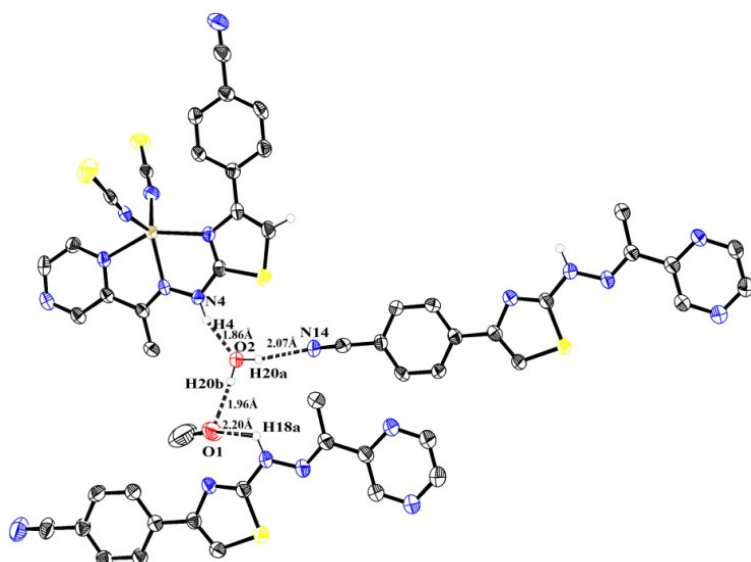

**Figure S5.** 3D hydrogen bonded supramolecular structure and molecular association along the b-axis of **2**.

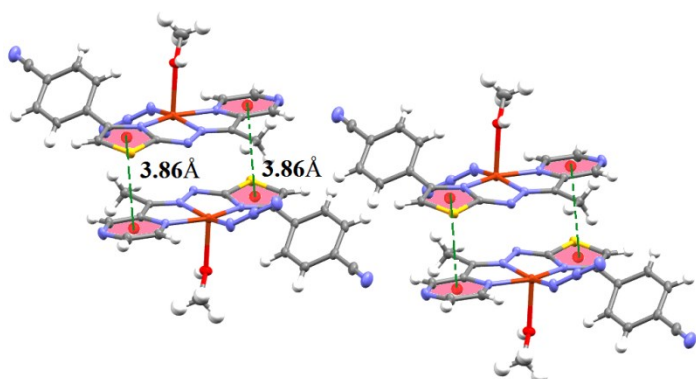

**Figure S6.**  $\pi$ - $\pi$  stacking interaction in **3**

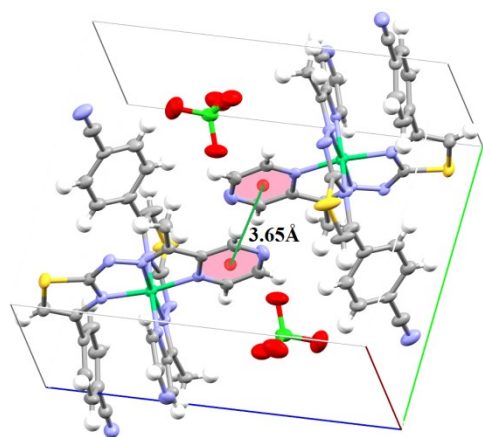

**Figure S7.**  $\pi$ - $\pi$  stacking interaction in **4**

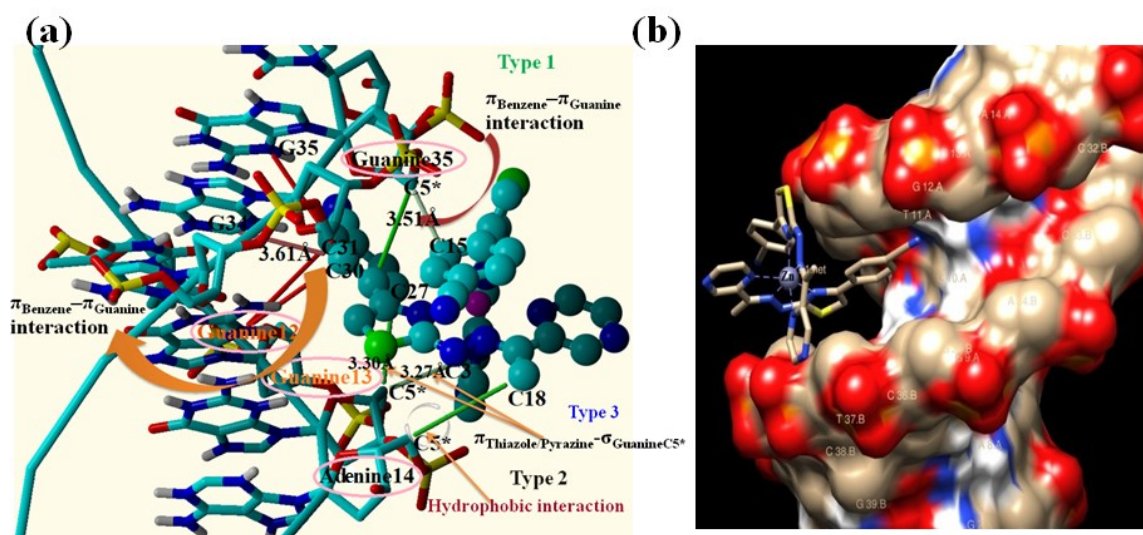

**Figure S8.** a) Capped-ball and stick model viewed into groove binder of DNA with **1**. The important interactions between different sections of the **1**-DNA complex are illustrated with green, red and gray solid line. The non-coordinate acetyl -CH<sub>3</sub> group, benzene ring interacts with DNA by hydrophobic and  $\pi_{\text{adimine}}-\pi$  stacking interaction respectively (b) space filled model of binding mode and hydrophobic interaction of **1** with DNA.

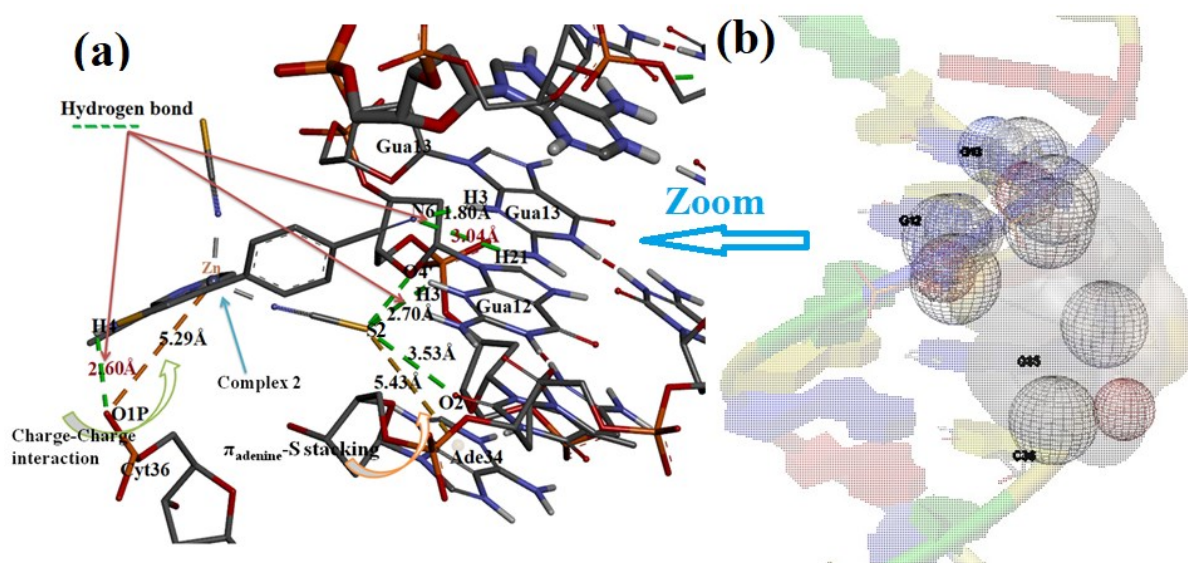

**Figure S9.** a) Capped-ball and stick model viewed into groove binder of DNA with **2**. The important interactions between different sections of the **2**-DNA complex are illustrated with dotted solid line. (b) space filled model of binding mode and hydrophobic interaction of **2** with DNA.

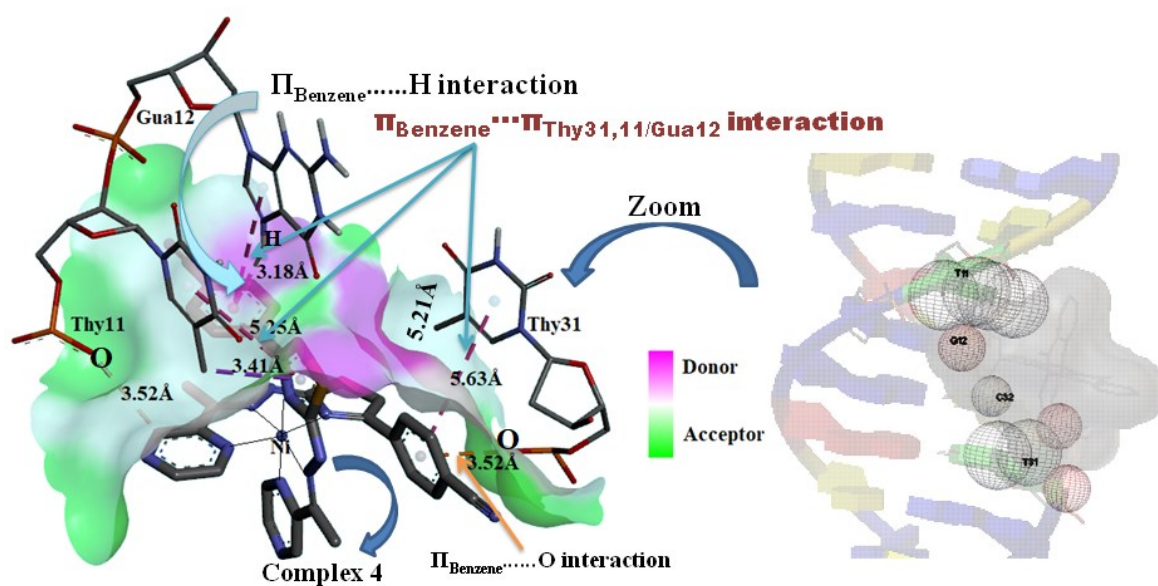

**Figure S10.** a) Capped-ball and stick model viewed into intercalate binder of DNA with **4**. The important interactions between different sections of the **4**-DNA complex are illustrated with arrow solid line. (b) Space filled model of binding mode and hydrophobic interaction of **4** with DNA.

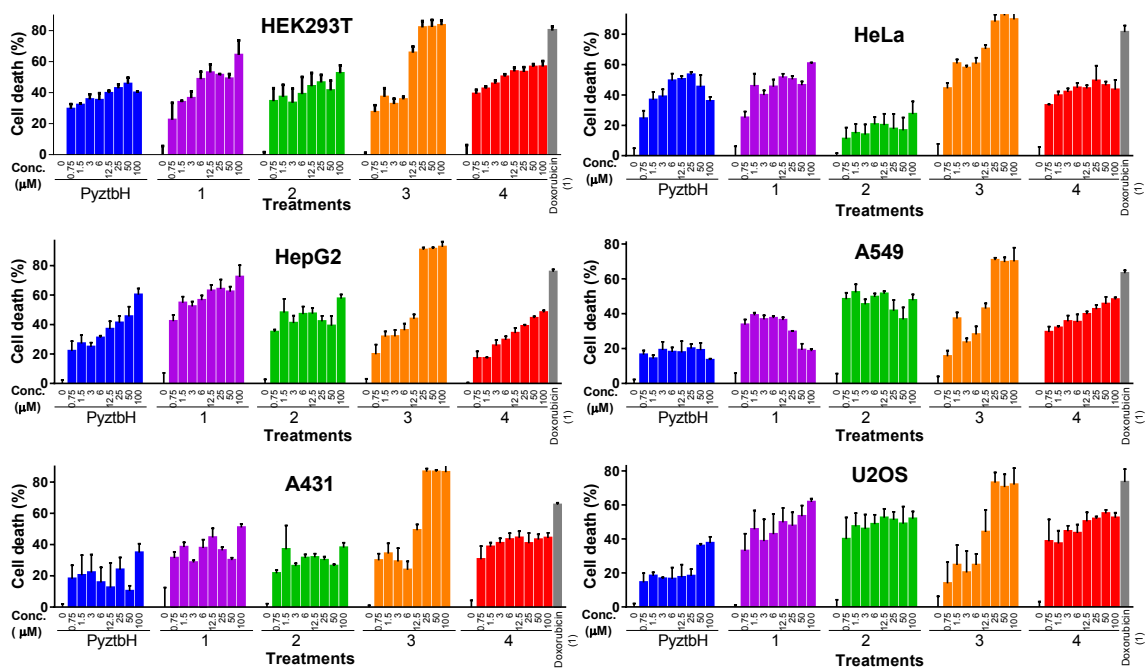

**Figure S11.** Effect of compounds on cytotoxicity of different cancer cells. Several tumor cells (5000 cell/well of 96-Well plate) were treated with different concentrations of ligand (PyztbH) and its derivatives **1**, **2**, **3** and **4** for 72 h in triplicate. MTT cell viability was assayed. Doxorubicin (1  $\mu\text{M}$ ) treated cells was considered as positive control. Mean cell death from triplicate samples were calculated in percentage, considering untreated cell death is 0% and indicated in the graph. Data were transformed, normalized and  $\text{IC}_{50}$  values were calculated using Graph Pad Prism.
